# Supplementary material
Source: publisher figshare collection journal article supplement (https://gsapubs.figshare.com/articles/dataset/_/12535385)
Supplement: Supplementary file 1 [file 1]

GSA Data Repository Item 2017263

Zhao, Z.-F., Zheng, Y.-F., Chen, Y.-X., and Sun, G.-C., 2017, Partial melting of subducted continental crust: Geochemical evidence from syn-exhumation granite in the Sulu orogen: GSA Bulletin, doi:10.1130/B31675.1.

## **DATA REPOSITORY TABLES**

Table DR1–DR4
